# Supplementary material
Source: PubMed Central journal article supplement (PMC9170127)
Supplement: NIHMS1783858-supplement-Supplementary_Material.pdf [file NIHMS1783858-supplement-Supplementary_Material.pdf]

**Supplemental content for  
Utility of  $^{18}\text{F}$ -Fluciclovine PET/MRI for Staging Newly Diagnosed High-Risk  
Prostate Cancer and Evaluating Response to Initial Androgen Deprivation  
Therapy: A Prospective Single-Arm Pilot Study**

*Samuel J. Galgano, MD, Andrew M. McDonald, MD, MS, Soroush Rais-Bahrami, MD,  
Kristin K. Porter, MD, PhD, Gagandeep Choudhary, MD, Constantine Burgan, MD,  
Pradeep Bhambhani, MD, Jeffrey W. Nix, MD, Desiree E. Morgan, MD, Yufeng Li, PhD,  
John V. Thomas, MD, Jonathan McConathy, MD, PhD*

[doi.org/10.2214/AJR.20.24509](https://doi.org/10.2214/AJR.20.24509)

Published online: October 14, 2020

The authors have supplied these materials to give readers additional information about the work.



|    |      |     |     |   |                 |   |   |   |   |   |   |   |   |   |   |   |   |   |   |         |
|----|------|-----|-----|---|-----------------|---|---|---|---|---|---|---|---|---|---|---|---|---|---|---------|
|    |      |     | MR3 | 3 | R apex-base     | 1 | 3 | 0 | 0 | 0 | 0 | 0 | 0 | 0 | 0 | 0 | 0 | 0 | 0 |         |
| 10 | 11.1 | 4+5 | MR1 | 3 | mid PM PZ       | 1 | 0 | 0 | 0 | 0 | 0 | 1 | 2 | 0 | 0 | 0 | 0 | 0 | 0 |         |
|    |      |     | MR2 | 3 | L mid PZ        | 0 | 2 | 0 | 0 | 0 | 2 | 1 | 1 | 0 | 0 | 0 | 0 | 0 | 0 |         |
|    |      |     | MR3 | 3 | L mid-base      | 0 | 0 | 0 | 0 | 0 | 2 | 0 | 1 | 0 | 0 | 0 | 0 | 0 | 0 |         |
| 11 | 36.8 | 4+3 | MR1 | 3 | L ant apex-base | 1 | 1 | 0 | 0 | 0 | 0 | 0 | 0 | 0 | 0 | 1 | 1 | 0 | 0 |         |
|    |      |     | MR2 | 3 | entire gland    | 1 | 2 | 0 | 0 | 0 | 0 | 0 | 0 | 0 | 0 | 1 | 1 | 0 | 0 |         |
|    |      |     | MR3 | 3 | entire gland    | 1 | 3 | 0 | 0 | 0 | 0 | 0 | 0 | 0 | 0 | 2 | 2 | 0 | 0 |         |
| 12 | 10.4 | 4+5 | MR1 | 3 | L ant CG        | 2 | 0 | 0 | 0 | 0 | 0 | 0 | 0 | 0 | 0 | 0 | 0 | 0 | 0 |         |
|    |      |     | MR2 | 2 | L apex CG       | 0 | 2 | 0 | 0 | 0 | 0 | 0 | 0 | 0 | 0 | 0 | 0 | 0 | 0 |         |
|    |      |     | MR3 | 3 | L apex-mid CG   | 1 | 0 | 0 | 0 | 0 | 0 | 0 | 0 | 0 | 0 | 0 | 0 | 0 | 0 |         |
| 13 | 26.4 | 4+4 | MR1 | 3 | R base PL       | 2 | 0 | 0 | 0 | 0 | 0 | 2 | 0 | 0 | 0 | 0 | 0 | 0 | 2 | R iliac |
|    |      |     | MR2 | 3 | R base-mid      | 0 | 1 | 0 | 0 | 0 | 0 | 2 | 0 | 1 | 1 | 0 | 0 | 0 | 0 |         |
|    |      |     | MR3 | 3 | R base-mid      | 0 | 0 | 0 | 0 | 1 | 1 | 3 | 0 | 1 | 1 | 0 | 0 | 0 | 0 |         |
| 14 | 9.3  | 4+4 | MR1 | 3 | multifocal      | 2 | 0 | 1 | 0 | 0 | 0 | 1 | 0 | 0 | 0 | 1 | 0 | 0 | 0 |         |
|    |      |     | MR2 | 3 | apex-base R     | 2 | 0 | 0 | 0 | 0 | 0 | 0 | 0 | 1 | 0 | 1 | 0 | 0 | 0 |         |
|    |      |     | MR3 | 1 | R base          | 0 | 0 | 0 | 0 | 0 | 0 | 0 | 0 | 0 | 0 | 0 | 0 | 0 | 0 |         |
| 15 | 19.3 | 4+4 | MR1 | 3 | R PM apex-mid   | 3 | 0 | 0 | 0 | 0 | 0 | 0 | 0 | 3 | 0 | 0 | 0 | 2 | 0 |         |
|    |      |     | MR2 | 3 | R apex          | 0 | 0 | 0 | 0 | 0 | 0 | 0 | 0 | 3 | 0 | 0 | 0 | 0 | 0 |         |
|    |      |     | MR3 | 3 | R apex          | 0 | 0 | 0 | 0 | 0 | 0 | 0 | 0 | 3 | 0 | 0 | 0 | 0 | 0 |         |

PSA=prostate specific antigen. PCa=prostate cancer. EPE=extraprostatic extension. SVI=seminal vesicle invasion. RCI=right common iliac. LM=lymph node. LCI=left common iliac. RII=right internal iliac. LII=left internal iliac. REI=right external iliac. LEI=left external iliac. RO=right obturator. LO=left obturator. RI=right inguinal. LI=left inguinal. PAo=paraaortic. B=base. PZ=peripheral zone. R=right. L=left. Ant=anterior. PL=posterolateral. PM=posteromedial. CG=central gland. Hetero=heterogeneous. Fem=femoral.

**Table S2:** Patient data and individual <sup>18</sup>F-fluciclovine PET/MRI reads for pretreatment PET/MRI.\*

| Study # | PSA   | Gleason | Reader | PCa Likert score (0-3) | Location     | EPE | SVI | RCI LN | LCI LN | RII LN | LII LN | REI LN | LEI LN | RO LN | LO LN | RI LN | LI LN | PAo LN | Skeletal | Location | Extrapelvic Distant Met | Location |       |
|---------|-------|---------|--------|------------------------|--------------|-----|-----|--------|--------|--------|--------|--------|--------|-------|-------|-------|-------|--------|----------|----------|-------------------------|----------|-------|
| 1       | 76.5  | 4+5     | PT1    | 3                      | diffuse      | 1   | 3   | 0      | 0      | 3      | 3      | 0      | 0      | 0     | 0     | 0     | 0     | 0      | 0        |          | 0                       |          |       |
|         |       |         | PT2    | 3                      | diffuse      | 0   | 3   | 0      | 0      | 3      | 3      | 0      | 0      | 0     | 0     | 0     | 0     | 0      | 0        | 0        |                         | 0        |       |
|         |       |         | PT3    | 3                      | diffuse      | 0   | 3   | 0      | 0      | 3      | 3      | 1      | 1      | 0     | 0     | 1     | 1     | 0      | 0        | 0        |                         | 0        |       |
| 2       | 12.9  | 4+4     | PT1    | 3                      | R post       | 2   | 2   | 0      | 0      | 0      | 0      | 0      | 0      | 0     | 0     | 0     | 0     | 0      | 0        |          | 0                       |          |       |
|         |       |         | PT2    | 3                      | R base       | 0   | 3   | 0      | 0      | 0      | 0      | 0      | 0      | 0     | 0     | 0     | 0     | 0      | 0        | 0        |                         | 0        |       |
|         |       |         | PT3    | 3                      | R PZ         | 0   | 0   | 0      | 0      | 0      | 0      | 0      | 0      | 0     | 0     | 1     | 1     | 0      | 0        | 0        |                         | 0        |       |
| 3       | 8.4   | 4+5     | PT1    | 3                      | L            | 3   | 0   | 0      | 0      | 0      | 0      | 0      | 0      | 0     | 0     | 0     | 0     | 0      | 0        |          | 0                       |          |       |
|         |       |         | PT2    | 3                      | peripheral L | 3   | 0   | 0      | 0      | 0      | 0      | 0      | 0      | 0     | 0     | 0     | 0     | 0      | 0        | 3        | R frontal               | 0        |       |
|         |       |         | PT3    | 3                      | L PZ         | 3   | 0   | 0      | 0      | 0      | 0      | 0      | 0      | 0     | 0     | 1     | 1     | 0      | 0        | 0        |                         | 0        |       |
| 4       | 51.4  | 3+4     | PT1    | 1                      | diffuse      | 0   | 0   | 2      | 3      | 0      | 0      | 0      | 0      | 0     | 0     | 0     | 0     | 0      | 0        |          | 2                       | RP LN    |       |
|         |       |         | PT2    | 3                      | base         | 0   | 0   | 0      | 3      | 0      | 0      | 0      | 0      | 0     | 0     | 0     | 0     | 0      | 0        | 0        |                         | 2        | RP LN |
|         |       |         | PT3    | 3                      | R PZ         | 0   | 0   | 0      | 2      | 0      | 0      | 2      | 0      | 0     | 0     | 1     | 1     | 0      | 0        | 0        |                         | 2        | RP LN |
| 5       | 17.6  | 4+4     | PT1    | 3                      | diffuse      | 2   | 0   | 0      | 0      | 0      | 0      | 0      | 0      | 0     | 0     | 0     | 0     | 0      | 0        |          | 0                       |          |       |
|         |       |         | PT2    | 3                      | diffuse      | 0   | 0   | 0      | 0      | 0      | 0      | 0      | 0      | 0     | 0     | 0     | 0     | 0      | 0        | 0        |                         | 0        |       |
|         |       |         | PT3    | 3                      | diffuse      | 0   | 0   | 0      | 0      | 0      | 0      | 0      | 0      | 0     | 0     | 1     | 1     | 0      | 0        | 0        |                         | 0        |       |
| 6       | 57.7  | 3+4     | PT1    | 3                      | diffuse      | 0   | 3   | 0      | 0      | 0      | 0      | 0      | 0      | 0     | 0     | 0     | 0     | 0      | 0        |          | 0                       |          |       |
|         |       |         | PT2    | 3                      | diffuse      | 0   | 3   | 0      | 0      | 0      | 0      | 3      | 0      | 0     | 0     | 1     | 1     | 0      | 0        | 0        |                         | 0        |       |
|         |       |         | PT3    | 3                      | diffuse      | 0   | 2   | 0      | 0      | 2      | 0      | 2      | 0      | 0     | 1     | 1     | 1     | 0      | 0        | 0        |                         | 0        |       |
| 7       | 2.8   | 4+5     | PT1    | 3                      | R post       | 1   | 0   | 0      | 0      | 0      | 0      | 0      | 0      | 0     | 0     | 0     | 0     | 0      | 0        |          | 3                       | RP LN    |       |
|         |       |         | PT2    | 3                      | bilateral    | 0   | 0   | 0      | 0      | 0      | 0      | 1      | 0      | 0     | 0     | 1     | 1     | 0      | 0        | 0        |                         | 3        | RP LN |
|         |       |         | PT3    | 3                      | R PZ         | 0   | 0   | 0      | 0      | 0      | 0      | 2      | 0      | 0     | 0     | 1     | 1     | 0      | 0        | 0        |                         | 2        | RP LN |
| 8       | 100.0 | 4+3     | PT1    | 3                      | R ant L post | 3   | 0   | 1      | 0      | 0      | 0      | 0      | 0      | 0     | 0     | 0     | 0     | 0      | 0        |          | 0                       |          |       |
|         |       |         | PT2    | 3                      | bilateral    | 3   | 3   | 0      | 0      | 0      | 0      | 0      | 0      | 0     | 0     | 0     | 0     | 0      | 0        | 0        |                         | 0        |       |
|         |       |         | PT3    | 3                      | R apex, L    | 0   | 0   | 0      | 0      | 0      | 0      | 0      | 0      | 0     | 0     | 1     | 1     | 0      | 0        | 0        |                         | 0        |       |
| 9       | 30.9  | 4+3     | PT1    | 3                      | diffuse      | 2   | 0   | 0      | 0      | 0      | 0      | 0      | 0      | 0     | 0     | 0     | 0     | 0      | 0        |          | 0                       |          |       |
|         |       |         | PT2    | 2                      | periph R     | 0   | 0   | 0      | 0      | 1      | 0      | 0      | 0      | 0     | 0     | 0     | 0     | 0      | 0        | 0        |                         | 0        |       |
|         |       |         | PT3    | 3                      | B apex PZ    | 0   | 0   | 0      | 0      | 0      | 0      | 0      | 0      | 0     | 0     | 1     | 1     | 0      | 0        | 0        |                         | 0        |       |

|    |      |     |     |   |                          |   |   |   |   |   |   |   |   |   |   |   |   |   |   |   |   |  |   |                      |
|----|------|-----|-----|---|--------------------------|---|---|---|---|---|---|---|---|---|---|---|---|---|---|---|---|--|---|----------------------|
| 10 | 11.1 | 4+5 | PT1 | 3 | R post                   | 1 | 2 | 0 | 3 | 0 | 0 | 3 | 3 | 0 | 0 | 0 | 0 | 0 | 0 | 0 | 0 |  | 0 |                      |
|    |      |     | PT2 | 3 | bilobar                  | 0 | 0 | 0 | 2 | 0 | 0 | 3 | 3 | 0 | 0 | 0 | 0 | 0 | 0 | 0 | 0 |  | 0 |                      |
|    |      |     | PT3 | 3 | bilateral                | 0 | 0 | 0 | 3 | 0 | 0 | 3 | 3 | 0 | 3 | 1 | 1 | 0 | 0 | 0 | 0 |  | 0 |                      |
| 11 | 36.8 | 4+3 | PT1 | 3 | diffuse                  | 3 | 3 | 0 | 0 | 0 | 0 | 0 | 0 | 0 | 0 | 0 | 0 | 0 | 0 | 0 | 0 |  | 0 |                      |
|    |      |     | PT2 | 3 | diffuse                  | 3 | 0 | 0 | 0 | 0 | 0 | 0 | 2 | 0 | 0 | 1 | 1 | 0 | 0 | 0 | 0 |  | 0 |                      |
|    |      |     | PT3 | 3 | diffuse                  | 0 | 0 | 0 | 0 | 0 | 0 | 0 | 0 | 0 | 0 | 1 | 1 | 0 | 0 | 0 | 0 |  | 0 |                      |
| 12 | 10.4 | 4+5 | PT1 | 3 | diffuse                  | 1 | 0 | 0 | 0 | 0 | 0 | 0 | 0 | 0 | 0 | 0 | 0 | 0 | 0 | 0 | 0 |  | 0 |                      |
|    |      |     | PT2 | 3 | L apex                   | 0 | 0 | 0 | 0 | 0 | 0 | 0 | 0 | 0 | 0 | 0 | 0 | 0 | 0 | 0 | 0 |  | 0 |                      |
|    |      |     | PT3 | 3 | L PZ                     | 0 | 0 | 0 | 0 | 0 | 0 | 0 | 0 | 0 | 0 | 1 | 1 | 0 | 0 | 0 | 0 |  | 0 |                      |
| 13 | 26.4 | 4+4 | PT1 | 3 | central and R peripheral | 3 | 1 | 0 | 0 | 0 | 0 | 0 | 0 | 0 | 0 | 0 | 0 | 0 | 0 | 0 | 0 |  | 0 |                      |
|    |      |     | PT2 | 3 | R periph and bilat base  | 0 | 0 | 0 | 0 | 0 | 0 | 3 | 2 | 0 | 0 | 1 | 1 | 0 | 0 | 0 | 0 |  | 0 |                      |
|    |      |     | PT3 | 3 | diffuse                  | 0 | 0 | 0 | 0 | 0 | 0 | 3 | 2 | 0 | 1 | 1 | 1 | 0 | 0 | 0 | 0 |  | 0 |                      |
| 15 | 9.3  | 4+4 | PT1 | 3 | R apex                   | 0 | 0 | 0 | 0 | 0 | 0 | 0 | 0 | 3 | 0 | 1 | 1 | 3 | 0 | 0 | 0 |  | 3 | L ischiorectal fossa |
|    |      |     | PT2 | 3 | R apex                   | 0 | 0 | 0 | 0 | 0 | 0 | 0 | 0 | 3 | 0 | 0 | 0 | 3 | 0 | 0 | 0 |  | 3 | L ischiorectal fossa |
|    |      |     | PT3 | 3 | R apex                   | 0 | 0 | 0 | 0 | 0 | 0 | 0 | 0 | 3 | 0 | 1 | 1 | 3 | 0 | 0 | 0 |  | 3 | L ischiorectal fossa |

Patient 14 excluded due to lost images.

PSA=prostate specific antigen. PCa=prostate cancer. EPE=extraprostatic extension. SVI=seminal vesicle invasion. RCI=right common iliac. LM=lymph node. LCI=left common iliac. RII=right internal iliac. LII=left internal iliac. REI=right external iliac. LEI=left external iliac. RO=right obturator. LO=left obturator. RI=right inguinal. LI=left inguinal. PAo=paraaortic. B=base. PZ=peripheral zone. R=right. L=left. Ant=anterior. PL=posterolateral. PM=posteromedial. CG=central gland. Hetero=heterogeneous. Fem=femoral.



|    |      |                                                                                |               |                       |    |    |   |   |   |   |   |   |   |   |   |   |   |   |   |
|----|------|--------------------------------------------------------------------------------|---------------|-----------------------|----|----|---|---|---|---|---|---|---|---|---|---|---|---|---|
| 10 | 0.3  | PATIENT UNABLE TO COMPLETE ENTIRE EXAM AND NO DEDICATED PROSTATE MRI PERFORMED |               |                       |    |    |   |   |   |   |   |   |   |   |   |   |   |   |   |
| 11 | 1.3  | MR1                                                                            | 3             | diffuse               | 2  | 2  | 0 | 0 | 0 | 0 | 0 | 0 | 0 | 0 | 0 | 0 | 0 | 0 | 0 |
|    |      | MR2                                                                            | 2             | diffuse               | 2  | 2  | 0 | 0 | 0 | 0 | 0 | 0 | 0 | 0 | 0 | 0 | 0 | 0 | 0 |
|    |      | MR3                                                                            | 2             | L mid and base        | 0  | 0  | 0 | 0 | 0 | 0 | 0 | 0 | 0 | 0 | 0 | 0 | 0 | 0 | 0 |
| 12 | <0.1 | MR1                                                                            | prostatectomy | NA                    | NA | NA | 0 | 0 | 0 | 0 | 1 | 0 | 0 | 0 | 0 | 0 | 0 | 0 | 0 |
|    |      | MR2                                                                            | prostatectomy | NA                    | NA | NA | 0 | 0 | 0 | 0 | 0 | 0 | 0 | 0 | 0 | 0 | 0 | 0 | 0 |
|    |      | MR3                                                                            | prostatectomy | NA                    | NA | NA | 0 | 0 | 0 | 0 | 0 | 0 | 0 | 0 | 0 | 0 | 0 | 0 | 1 |
| 13 | 1.1  | MR1                                                                            | 2             | R apex-mid and L apex | 2  | 0  | 0 | 0 | 0 | 0 | 2 | 1 | 0 | 0 | 1 | 1 | 0 | 0 | 0 |
|    |      | MR2                                                                            | 2             | R apex-base           | 0  | 1  | 0 | 0 | 0 | 0 | 2 | 0 | 0 | 0 | 0 | 0 | 0 | 0 | 0 |
|    |      | MR3                                                                            | 3             | R mid                 | 2  | 0  | 0 | 0 | 0 | 0 | 3 | 0 | 0 | 0 | 0 | 0 | 0 | 0 | 0 |
| 15 | 5.7  | MR1                                                                            | 3             | R apex                | 3  | 0  | 0 | 0 | 0 | 0 | 2 | 0 | 2 | 0 | 0 | 0 | 0 | 0 | 0 |
|    |      | MR2                                                                            | 3             | R apex                | 1  | 0  | 0 | 0 | 0 | 0 | 0 | 0 | 0 | 0 | 0 | 0 | 0 | 0 | 0 |
|    |      | MR3                                                                            | 3             | R mid                 | 0  | 0  | 0 | 0 | 0 | 0 | 0 | 0 | 0 | 0 | 0 | 0 | 0 | 0 | 0 |

Patient 14 excluded due to lost images.

PSA=prostate specific antigen. PCa=prostate cancer. EPE=extraprostatic extension. SVI=seminal vesicle invasion. RCI=right common iliac. LM=lymph node. LCI=left common iliac. RII=right internal iliac. LII=left internal iliac. REI=right external iliac. LEI=left external iliac. RO=right obturator. LO=left obturator. RI=right inguinal. LI=left inguinal. PAo=para-aortic. B=base. PZ=peripheral zone. R=right. L=left. Ant=anterior. PL=posterolateral. PM=posteromedial. CG=central gland. Hetero=heterogeneous. Fem=femoral.

**Table S4:** Patient data and individual <sup>18</sup>F-fluciclovine PET/MRI reads for posttreatment PET/MRI.

| Study # | PSA       | Reader            | PCa Likert score (0-3) | Location          | EPE | SVI | RCI LN | LCI LN | RII LN | LII LN | REI LN | LEI LN | RO LN | LO LN | RI LN | LI LN | PAo LN | Skeletal | Location | Extrapelvic/<br>Distant Met | Location |  |
|---------|-----------|-------------------|------------------------|-------------------|-----|-----|--------|--------|--------|--------|--------|--------|-------|-------|-------|-------|--------|----------|----------|-----------------------------|----------|--|
| 1       | 5.45      | PT1               | 0                      | NA                | 0   | 0   | 0      | 0      | 0      | 0      | 0      | 0      | 0     | 0     | 1     | 1     | 0      | 0        |          | 0                           |          |  |
|         |           | PT2               | 3                      | midline near apex | 0   | 0   | 0      | 0      | 0      | 0      | 0      | 0      | 0     | 0     | 0     | 1     | 1      | 0        | 0        |                             | 0        |  |
|         |           | PT3               | 0                      | NA                | 0   | 0   | 0      | 0      | 0      | 0      | 0      | 0      | 0     | 0     | 0     | 0     | 0      | 0        | 0        |                             | 0        |  |
| 2       | <0.1<br>0 | PT1               | prostatectomy          | NA                | NA  | NA  | 0      | 0      | 0      | 0      | 0      | 0      | 0     | 0     | 0     | 0     | 0      | 0        |          | 0                           |          |  |
|         |           | PT2               | prostatectomy          | NA                | NA  | NA  | 0      | 0      | 0      | 0      | 0      | 0      | 0     | 0     | 0     | 1     | 1      | 0        | 0        |                             | 0        |  |
|         |           | PT3               | prostatectomy          | NA                | NA  | NA  | 0      | 0      | 0      | 0      | 0      | 0      | 0     | 0     | 0     | 0     | 0      | 0        | 0        |                             | 0        |  |
| 3       | <0.1<br>0 | WITHDREW          |                        |                   |     |     |        |        |        |        |        |        |       |       |       |       |        |          |          |                             |          |  |
| 4       | 0.45      | PT1               | 0                      | NA                | 0   | 0   | 0      | 0      | 0      | 0      | 2      | 3      | 0     | 0     | 1     | 3     | 0      | 0        |          | 0                           |          |  |
|         |           | PT2               | 3                      | bilateral         | 0   | 0   | 0      | 0      | 0      | 0      | 1      | 3      | 0     | 0     | 1     | 1     | 0      | 0        |          | 0                           |          |  |
|         |           | PT3               | 2                      | diffuse           | 0   | 0   | 0      | 0      | 0      | 0      | 0      | 0      | 0     | 0     | 0     | 0     | 0      | 0        | 0        |                             | 0        |  |
| 5       | 1.45      | PT1               | 1                      | diffuse           | 0   | 0   | 0      | 0      | 0      | 0      | 1      | 0      | 0     | 0     | 1     | 1     | 0      | 2        | S2       | 0                           |          |  |
|         |           | PT2               | 3                      | bilateral         | 0   | 0   | 0      | 0      | 0      | 0      | 0      | 0      | 0     | 0     | 1     | 1     | 0      | 0        |          | 1                           |          |  |
|         |           | PT3               | 2                      | diffuse           | 0   | 0   | 0      | 0      | 0      | 0      | 0      | 0      | 0     | 0     | 0     | 0     | 0      | 0        |          | 0                           |          |  |
| 6       | 0.81      | PT1               | 3                      | diffuse           | 0   | 0   | 0      | 0      | 3      | 0      | 1      | 0      | 0     | 0     | 1     | 1     | 0      | 0        |          | 0                           |          |  |
|         |           | PT2               | 3                      | bilateral         | 0   | 0   | 0      | 0      | 2      | 0      | 0      | 0      | 0     | 0     | 1     | 1     | 0      | 0        |          | 0                           |          |  |
|         |           | PT3               | 2                      | diffuse           | 0   | 0   | 0      | 0      | 0      | 0      | 1      | 0      | 0     | 0     | 0     | 0     | 0      | 0        |          | 0                           |          |  |
| 7       | 0.99      | PT1               | 0                      | NA                | 0   | 0   | 0      | 0      | 0      | 0      | 0      | 0      | 0     | 0     | 1     | 1     | 0      | 0        |          | 3                           | RP LN    |  |
|         |           | PT2               | 3                      | R apex            | 3   | 3   | 0      | 0      | 0      | 0      | 1      | 0      | 0     | 0     | 1     | 1     | 0      | 0        |          | 0                           |          |  |
|         |           | PT3               | 1                      | R PZ              | 0   | 0   | 0      | 0      | 0      | 0      | 0      | 0      | 0     | 0     | 0     | 0     | 0      | 0        |          | 2                           | RP LN    |  |
| 8       |           | LOST TO FOLLOW-UP |                        |                   |     |     |        |        |        |        |        |        |       |       |       |       |        |          |          |                             |          |  |
| 9       | 3.8       | PT1               | 2                      | R lateral         | 0   | 0   | 0      | 0      | 0      | 0      | 0      | 0      | 0     | 0     | 1     | 1     | 0      | 0        |          | 0                           |          |  |
|         |           | PT2               | 3                      | R                 | 0   | 0   | 0      | 0      | 0      | 0      | 1      | 0      | 0     | 0     | 1     | 1     | 0      | 0        |          | 0                           |          |  |
|         |           | PT3               | 2                      | R                 | 0   | 0   | 0      | 0      | 0      | 0      | 0      | 0      | 0     | 0     | 0     | 0     | 0      | 0        |          | 0                           |          |  |



|    |      |     |               |                   |    |    |   |   |   |   |   |   |   |   |   |   |   |   |   |   |   |  |
|----|------|-----|---------------|-------------------|----|----|---|---|---|---|---|---|---|---|---|---|---|---|---|---|---|--|
| 10 | 0.29 | PT1 | 3             | L peripheral      | 0  | 0  | 0 | 0 | 0 | 0 | 0 | 0 | 0 | 0 | 3 | 1 | 1 | 0 | 0 |   | 0 |  |
|    |      | PT2 | 3             | bilateral         | 3  | 3  | 0 | 0 | 0 | 0 | 1 | 0 | 0 | 0 | 2 | 1 | 1 | 0 | 0 |   | 1 |  |
|    |      | PT3 | 2             | L PZ              | 1  | 1  | 0 | 0 | 0 | 0 | 0 | 0 | 0 | 0 | 2 | 0 | 0 | 0 | 0 |   | 0 |  |
| 11 | 1.32 | PT1 | 0             | NA                | 0  | 0  | 0 | 0 | 0 | 0 | 0 | 0 | 0 | 0 | 0 | 0 | 0 | 0 | 0 |   | 0 |  |
|    |      | PT2 | 2             | L peripheral      | 0  | 0  | 0 | 0 | 0 | 0 | 0 | 0 | 0 | 0 | 0 | 1 | 1 | 0 | 0 |   | 0 |  |
|    |      | PT3 | 0             | NA                | 0  | 0  | 0 | 0 | 0 | 0 | 0 | 0 | 0 | 0 | 0 | 0 | 0 | 0 | 0 |   | 0 |  |
| 12 | 0.01 | PT1 | prostatectomy | NA                | NA | NA | 0 | 0 | 0 | 0 | 0 | 0 | 0 | 0 | 0 | 1 | 1 | 0 | 0 |   | 0 |  |
|    |      | PT2 | prostatectomy | NA                | NA | NA | 0 | 0 | 0 | 0 | 1 | 0 | 0 | 0 | 0 | 1 | 1 | 0 | 0 |   | 0 |  |
|    |      | PT3 | prostatectomy | NA                | NA | NA | 0 | 0 | 0 | 0 | 0 | 0 | 0 | 0 | 0 | 0 | 0 | 0 | 0 |   | 0 |  |
| 13 | 1.08 | PT1 | 3             | diffuse           | 0  | 0  | 0 | 0 | 0 | 0 | 2 | 2 | 0 | 0 | 1 | 1 | 0 | 0 |   | 0 |   |  |
|    |      | PT2 | 3             | bilateral         | 0  | 0  | 0 | 0 | 0 | 0 | 3 | 2 | 0 | 0 | 1 | 1 | 0 | 0 |   | 0 |   |  |
|    |      | PT3 | 2             | diffuse           | 0  | 0  | 0 | 0 | 0 | 0 | 3 | 3 | 0 | 0 | 0 | 0 | 0 | 0 |   | 0 |   |  |
| 15 | 5.66 | PT1 | 2             | central           | 0  | 0  | 0 | 0 | 0 | 0 | 0 | 0 | 0 | 0 | 1 | 1 | 0 | 0 |   | 0 |   |  |
|    |      | PT2 | 3             | bilateral central | 0  | 0  | 0 | 0 | 0 | 0 | 0 | 0 | 0 | 0 | 1 | 1 | 0 | 0 |   | 0 |   |  |
|    |      | PT3 | 2             | central           | 0  | 0  | 0 | 0 | 0 | 0 | 0 | 0 | 0 | 0 | 0 | 0 | 0 | 0 |   | 0 |   |  |

Patient 14 excluded due to lost images.

PSA=prostate specific antigen. PCa=prostate cancer. EPE=extraprostatic extension. SVI=seminal vesicle invasion. RCI=right common iliac. LM=lymph node. LCI=left common iliac. RII=right internal iliac. LII=left internal iliac. REI=right external iliac. LEI=left external iliac. RO=right obturator. LO=left obturator. RI=right inguinal. LI=left inguinal. PAo=paraaortic. B=base. PZ=peripheral zone. R=right. L=left. Ant=anterior. PL=posterolateral. PM=posteromedial. CG=central gland. Hetero=heterogeneous. Fem=femoral.
